# Supplementary material for: The effect of short-course antibiotics on the resistance profile of colonizing gut bacteria in the ICU: a prospective cohort study
Source: Springer Nature journal article supplement (doi:10.1186/s13054-020-03061-8), 2020-07-09

Number of positive genes

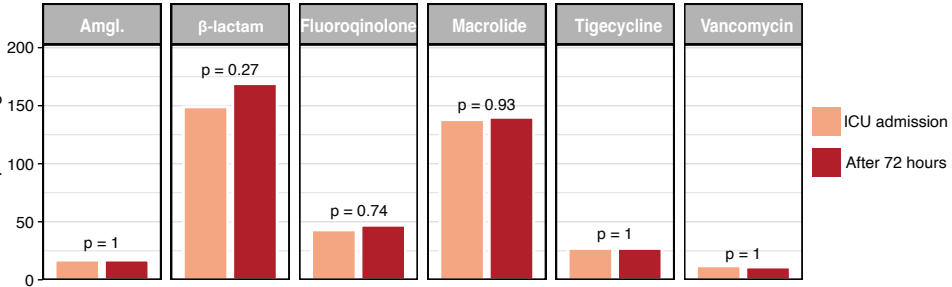

Supplement: MOESM3 [file 18163504]
